# Supplementary material for: Brassinosteroids play a critical role in the regulation of pesticide metabolism in crop plants
Source: PubMed Central journal article supplement (PMC4356967; doi:10.1038/srep09018), 2015-03-12

**Title:**

Brassinosteroids play a critical role in the regulation of pesticide metabolism in crop plants

**Authors:**

Yanhong Zhou<sup>1,5</sup>, Xiajian Xia<sup>1,5</sup>, Gaobo Yu<sup>1,5</sup>, Jitao Wang<sup>1</sup>, Jingxue Wu<sup>1</sup>, Mengmeng Wang<sup>1</sup>, Youxin Yang<sup>1</sup>, Kai Shi<sup>1</sup>, Yunlong Yu<sup>2</sup>, Zhixiang Chen<sup>3</sup>, Jay Gan<sup>4</sup>, Jingquan Yu<sup>1,\*</sup>

<sup>1</sup>*Department of Horticulture, Zijingang Campus, Zhejiang University, 866 Yuhangtang Road, Hangzhou, 310058, P.R. China*

<sup>2</sup>*Institute of Pesticide & Environmental Toxicology, Zijingang Campus, Zhejiang University, 866 Yuhangtang Road, Hangzhou, 310058, P.R. China*

<sup>3</sup>*Department of Botany & Plant Pathology, Purdue University, West Lafayette, IN 47907-2054, USA*

<sup>4</sup>*Department of Environmental Science, University of California Riverside, Riverside, CA 92521, USA*

<sup>5</sup>*These authors contributed equally to this work.*

*\* To whom correspondence should be addressed. E-mail: jqyu@zju.edu.cn*

**Table S1.** Up-regulated genes selected in EBR, CHT or EBR&CHT treatment

| GeneBank ID Gene description                              | Fold change |         |         |
|-----------------------------------------------------------|-------------|---------|---------|
|                                                           | EBR         | CHT     | EBR+CHT |
| <b><i>Cytochrome P450</i></b>                             |             |         |         |
| AI776109 cytochrome-c oxidase activity                    | 1.7415      | 2.2907  | 5.1313  |
| BF112381 cytochrome-c oxidase activity                    | 5.5507      | 5.6309  | 8.0496  |
| <b><i>Oxidoreductase</i></b>                              |             |         |         |
| AF088276.1 NADPH oxidase activity                         | 2.5578      | 2.6485  | 5.8656  |
| AY008278.1 lipoxygenase                                   | 2.3882      | 2.6438  | 3.3803  |
| BG627719 oxidoreductase activity                          | 3.855       | 2.8073  | 4.1324  |
| AF146691.1 Eli3 protein                                   | 3.0996      | 2.9781  | 4.1405  |
| CK715617 oxidoreductase activity                          | 6.8168      | 4.7235  | 6.4869  |
| CN384480 peroxidase                                       | 5.5564      | 5.3219  | 6.6151  |
| BM410158 oxidoreductase activity, sterol carrier activity | 1.8222      | 2.0917  | 2.6426  |
| BG627812 3-oxo-5-alpha-steroid 4-dehydrogenase activity   | 3.3503      | 4.1613  | 4.716   |
| AI776010 arsenate reductase (glutaredoxin) activity       | 2.2675      | 2.7736  | 3.3164  |
| <b><i>Hydrolase</i></b>                                   |             |         |         |
| AF020390.2 catalytic activity, hydrolase activity         | 2.6215      | 3.5347  | 4.596   |
| AW093105 hydrolase activity, ATP binding                  | 30.9665     | 20.6263 | 50.4062 |
| X79337.1 hydrolase activity, endonuclease activity        | 32.9911     | 34.0407 | 42.463  |
| X79338.1 hydrolase activity, nuclease activity            | 2.0745      | 2.3981  | 2.8656  |
| CK468696 chitinase activity                               | 6.2805      | 4.1118  | 7.6126  |
| <b><i>Transferase Activity</i></b>                        |             |         |         |
| CN385367 thiol-disulfide exchange intermediate activity   | 4.788       | 4.3973  | 5.645   |
| AW036032 glutathione transferase activity                 | 2.6914      | 2.6734  | 2.935   |
| CK468710 glutathione transferase activity                 | 5.1388      | 3.4619  | 4.8882  |
| BG627684 glutathione transferase activity                 | 9.6957      | 3.7924  | 5.9522  |
| AY081905.1 N-hydroxycinnamoyl transferase THT1-3          | 7.7508      | 4.7491  | 9.1679  |
| AY007559.1 transferase activity                           | 14.9118     | 8.1856  | 11.6772 |
| AW036070 N-acetyltransferase activity                     | 2.7197      | 2.846   | 3.2293  |
| BI205190 UDP-glycosyltransferase activity                 | 6.0548      | 3.0434  | 5.1568  |

***Transporter Activity***

|            |                                                  |         |        |         |
|------------|--------------------------------------------------|---------|--------|---------|
| AY026343.1 | oxygen transporter activity                      | 6.6267  | 4.0534 | 6.0643  |
| AY731066.1 | transporter activity                             | 11.5998 | 5.9842 | 10.1278 |
| AI781372   | protein transporter activity, conjugating enzyme | 1.6964  | 2.4052 | 2.8667  |
| CK720579   | purine transporter activity                      | 3.0676  | 2.8781 | 3.6348  |

***Ion Binding***

|            |                                                           |         |         |         |
|------------|-----------------------------------------------------------|---------|---------|---------|
| AI775413   | calcium- and calmodulin-dependent protein kinase activity | 3.0676  | 2.0447  | 2.2871  |
| AY642285.1 | regulator of gene silencing                               | 13.8157 | 5.0619  | 11.9526 |
| X55193.1   | 9612 protein, calcium ion binding                         | 7.3558  | 16.7857 | 26.8781 |
| Z68185.1   | metallothionein-like protein                              | 2.9688  | 4.4508  | 4.8496  |
| BI203707   | copper ion binding                                        | 1.6886  | 4.9358  | 6.0638  |

***Transcription Factor***

|            |                                        |        |        |        |
|------------|----------------------------------------|--------|--------|--------|
| AJ277944.1 | SANT/MYB domain protein                | 5.0883 | 2.0452 | 3.4043 |
| X99210.1   | myb-related transcription factor       | 4.2032 | 2.5987 | 3.7005 |
| AY044236.1 | ethylene-responsive factor 1           | 2.0414 | 2.1668 | 2.4306 |
| AJ715788.1 | anaerobic basic leucine zipper protein | 3.567  | 2.4517 | 3.8084 |
| AY157063.1 | WRKY transcription factor IId-4        | 2.8939 | 2.8722 | 3.4872 |
| AY077626.1 | transcription factor activity          | 2.0031 | 4.2356 | 5.1793 |
| BM413526   | ethylene response factor 1             | 2.1864 | 2.2521 | 2.5841 |

***Signal Transducer Activity***

|            |                                          |        |        |        |
|------------|------------------------------------------|--------|--------|--------|
| CK715617   | protein serine/threonine kinase activity | 6.8168 | 4.7235 | 6.4869 |
| J04099.1   | proteinase inhibitor I                   | 1.7282 | 4.8397 | 5.1086 |
| X94946.1   | proteinase inhibitor II                  | 2.1967 | 7.481  | 9.158  |
| BG628357   | signal transducer activity               | 4.4591 | 3.1082 | 4.1492 |
| AF083253.1 | cysteine protease inhibitor              | 0.9753 | 4.7288 | 6.0271 |

---

Data are means of four biological replicates

**Table S2.** Primers used for virus induced gene silencing

| Gene         | Primer pairs                      |
|--------------|-----------------------------------|
| <i>BRI1</i>  | F: CGCGGATCCACCCAACCTCTGCTTCAGAAC |
|              | R: CGGGGTACCAGAACAACACCAAAGATAGAG |
| <i>RBOH1</i> | F: AAGAATGGGGTTGATATTGT           |
|              | R: CTCTGACTTATTCCTTAC             |
| <i>GSH1</i>  | F: TGCTCTAGAGAACCCTGCGACCCAT      |
|              | R: CGCGGATCCAAGACCAGCACGGAAC      |
| <i>GSH2</i>  | F: TGCTCTAGACCAGCCAAACGTAAAG      |
|              | R: CGCGGATCCAAGTCCACGAAGAGGG      |
| <i>GR</i>    | F: TGCTCTAGAAGCCATAGAGGTTGACGA    |
|              | R: CGCGGATCCTCTGCTGCTGTAGGGTGA    |
| <i>GST1</i>  | F: TGCTCTAGAGTGAGTTCGTCGGAGTTA    |
|              | R: CGCGGATCCAGTTTGAGTGATGCCAGT    |
| <i>GST2</i>  | F: CGAGCTCTGGGCACAAAAGAAAGTA      |
|              | R: CCGCTCGAGTAATCCCTCTACCACCGA    |
| <i>GST3</i>  | F: TGCTCTAGAGAACAAGAGGCAGGTA      |
|              | R: CGCGGATCCCAAGATAAAGGCAGAAT     |
| <i>GST4</i>  | F: TGCTCTAGAATTGTTGAGGAGGTTGTG    |
|              | R: CGCGGATCCTGCGGTATGCCCTTATTT    |
| <i>GST5</i>  | F: CCGGAATTCCTACTACACGACGACAA     |
|              | R: CCGCTCGAGGGCACTGAGCCAAAGA      |
| <i>GST6</i>  | F: TGCTCTAGATTGGGCTGATTACATTG     |
|              | R: CGCGGATCCTTCTGCCTTAGCACTTT     |
| <i>GST7</i>  | F: TGCTCTAGAGGATTGCCCTAGCTGAA     |
|              | R: CGCGGATCCAGTATGGTTTGTCTCCC     |

F indicates forward and R indicates reverse.

**Table S3.** Primers used for real time RT-PCR assays

| Gene               | Primer pairs             |
|--------------------|--------------------------|
| <i>Actin</i>       | F:TGGTCGGAATGGGACAGAAG   |
|                    | R:CTCAGTCAGGAGAACAGGGT   |
| <i>GST1</i>        | F: CTGCATTCTGGGTGGGT     |
|                    | R: CTCGGCTACTTCGTTCA     |
| <i>GST2</i>        | F: ACATTGCCAAACTACGG     |
|                    | R: ACCTCTGACATCCTCCC     |
| <i>GST3</i>        | F: ATGGACAACAAAGGGAGGAG  |
|                    | R: CCAATCAACGCAATATCCAC  |
| <i>GSH1</i>        | F: CTGCATTCTGGGTGGGT     |
|                    | R: CTCGGCTACTTCGTTCA     |
| <i>GSH2</i>        | F: TTGATGCGAACAAAGGTCTC  |
|                    | R: ATAGTGTCAACGCGCAAGAC  |
| <i>RBOH1</i>       | F:CATTTGATTTGGGACA       |
|                    | R:CTTCAACAAACTCCTCC      |
| <i>ABC1</i>        | F: TCATTGAGGAGGTCATGGAA  |
|                    | R: AATCCAGAGGTTGGCTCATC  |
| <i>ABC2</i>        | F: AGGTTGACGATTGCAGTTGA  |
|                    | R: TCTCATCACAATTGCAGCAG  |
| <i>ABC3</i>        | F: GCACTTGTGCAGGAGTTTGT  |
|                    | R: TGTCAGCCGTTTACGTTGTT  |
| <i>ABC4</i>        | F: TCATTGAGGAGGTCATGGAA  |
|                    | R: AATCCAGAGGTTGGCTCATC  |
| <i>CYP724B2</i>    | F: TCGCATAAGGGTGAGT      |
|                    | R: CCTGAGTGGCAAGACA      |
| <i>P450AI77610</i> | F:TGGATTGCACATGCCACATT   |
|                    | R: TTGCGATAGGTATTTCTTGAC |
| <i>P450BF11238</i> | F:CACATGCTGCATACAAGGGTC  |
|                    | R: CTGGTTGTTCCAATGGTGCT  |

F indicates forward and R indicates reverse.

## Figure legends

**Fig. S1.** Time-course of chlorothalonil (CHT) residues in tomato leaves as influenced by the application dose of 24-epibrassinolide (EBR). Plants at the 6-leaf stage were sprayed with EBR at different concentrations and then exposed to CHT at 11.2 mM. EBR at 0.1  $\mu\text{M}$  was applied 6 h prior to CHT application and CHT residues were determined 7 d afterward. Data are means of four biological replicates ( $\pm\text{SD}$ ).

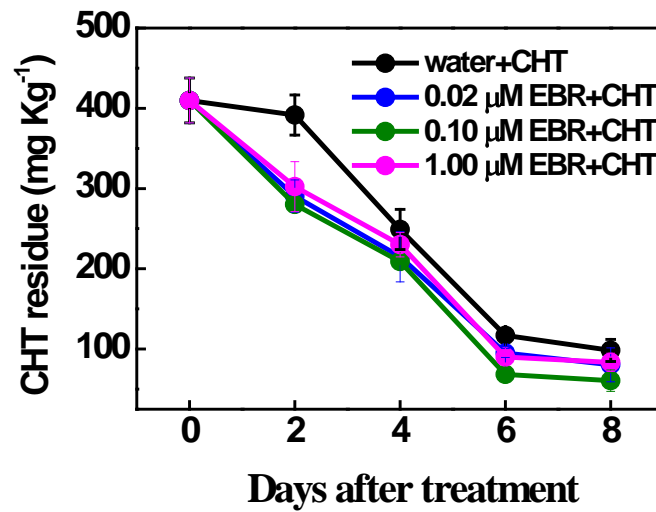

**Fig. S2.** Transcripts of detoxifying genes as influenced by 24-epibrassinolide (EBR), chlorothalonil (CHT) and EBR+CHT treatments in wild-type (WT) and BR-deficient mutant  $d^{im}$  plants. EBR at 0.1  $\mu$ M was applied 6 h prior to pesticide application and leaves were taken at 5 d after application of CHT at 11.2 mM. Data are means of four biological replicates ( $\pm$ SD). Means denoted by the same letter did not significantly differ at  $P < 0.05$  according to Tukey's test.

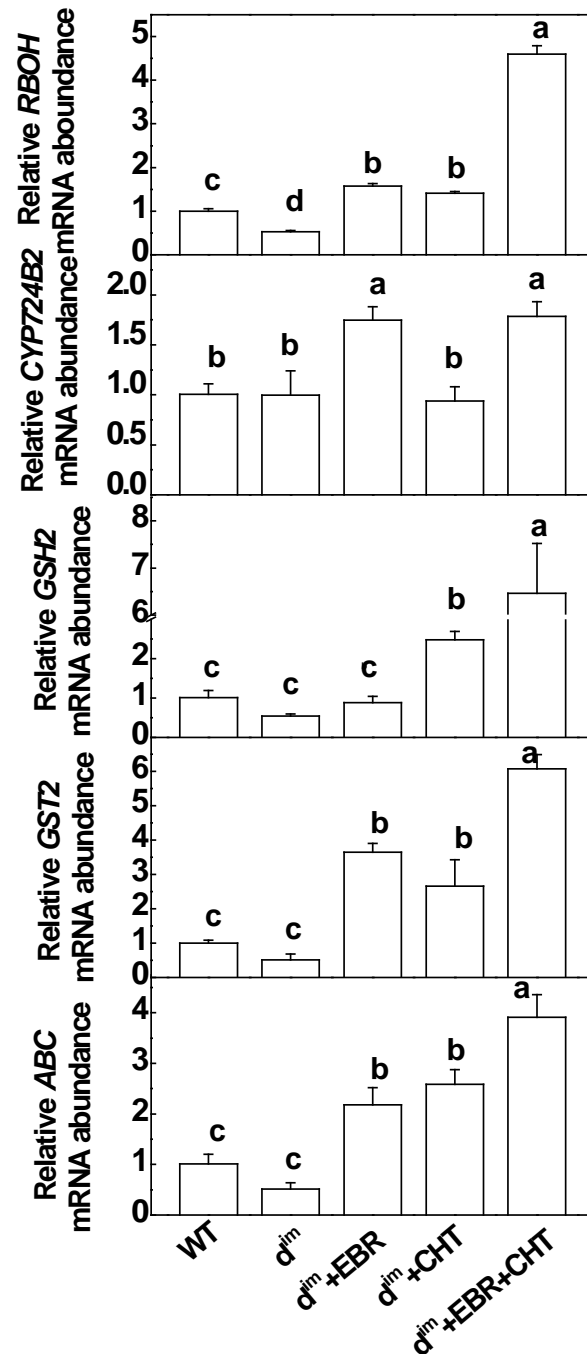

**Fig. S3.** H<sub>2</sub>O<sub>2</sub>, glutathione homeostasis and GST activity as influenced by 24-epibrassinolide (EBR), chlorothalonil (CHT) and EBR+CHT treatments in wild-type (WT) and BR-deficient mutant *d<sup>im</sup>* plants. EBR at 0.1 μM was applied 6 h prior to pesticide application and leaves were taken at 5 d after application of CHT at 11.2 mM. Data are means of four biological replicates (±SD). Means denoted by the same letter did not significantly differ at *P* < 0.05 according to Tukey's test.

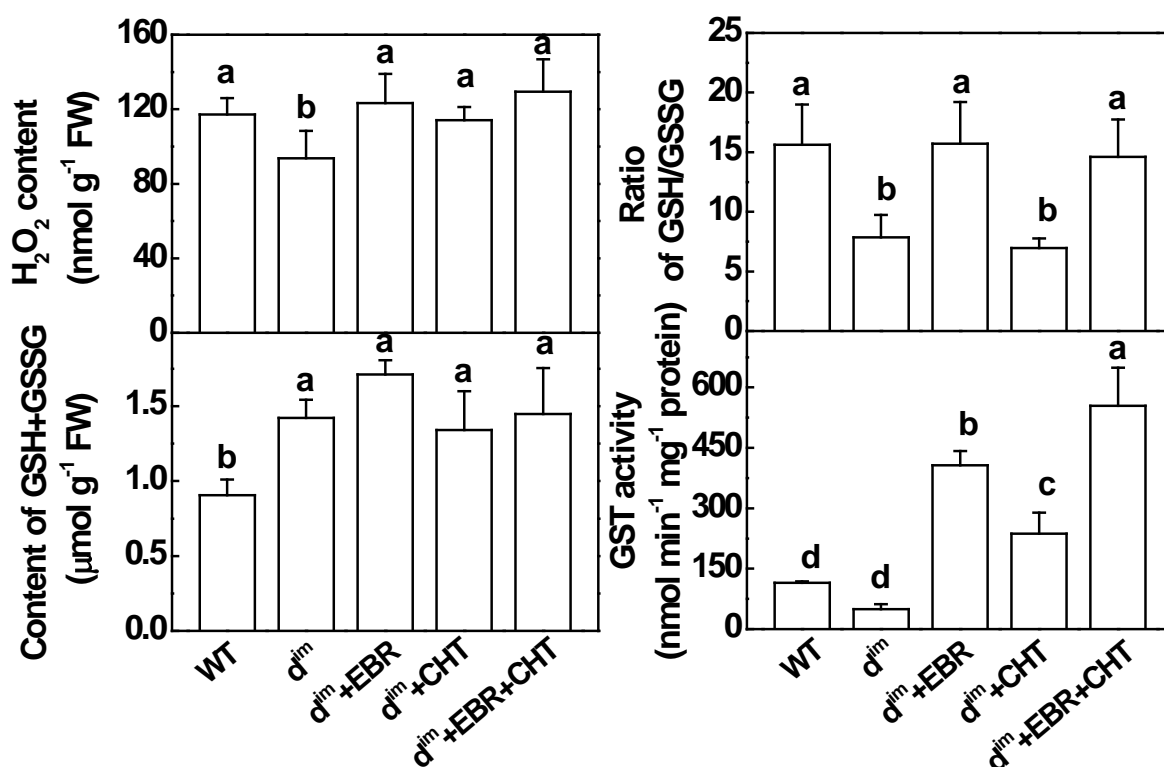



**Fig. S4.** H<sub>2</sub>O<sub>2</sub> accumulation and transcripts of detoxifying genes as influenced by H<sub>2</sub>O<sub>2</sub> and glutathione homeostasis in tomato leaves. Plant were treated with distilled water (DW), EBR or H<sub>2</sub>O<sub>2</sub> with or without pretreatment of inhibitor of NADPH oxidase (DPI), scavenger of H<sub>2</sub>O<sub>2</sub> (DMTU) or blocker of glutathione homeostasis (6-AN) and then applied with chlorothalonil (CHT). EBR at 0.1 μM was applied 6 h prior to pesticide application and leaves were taken at 5 d after application of CHT at 11.2 mM. Data are means of four biological replicates (±SD). Means denoted by the same letter did not significantly differ at *P* < 0.05 according to Tukey's test.

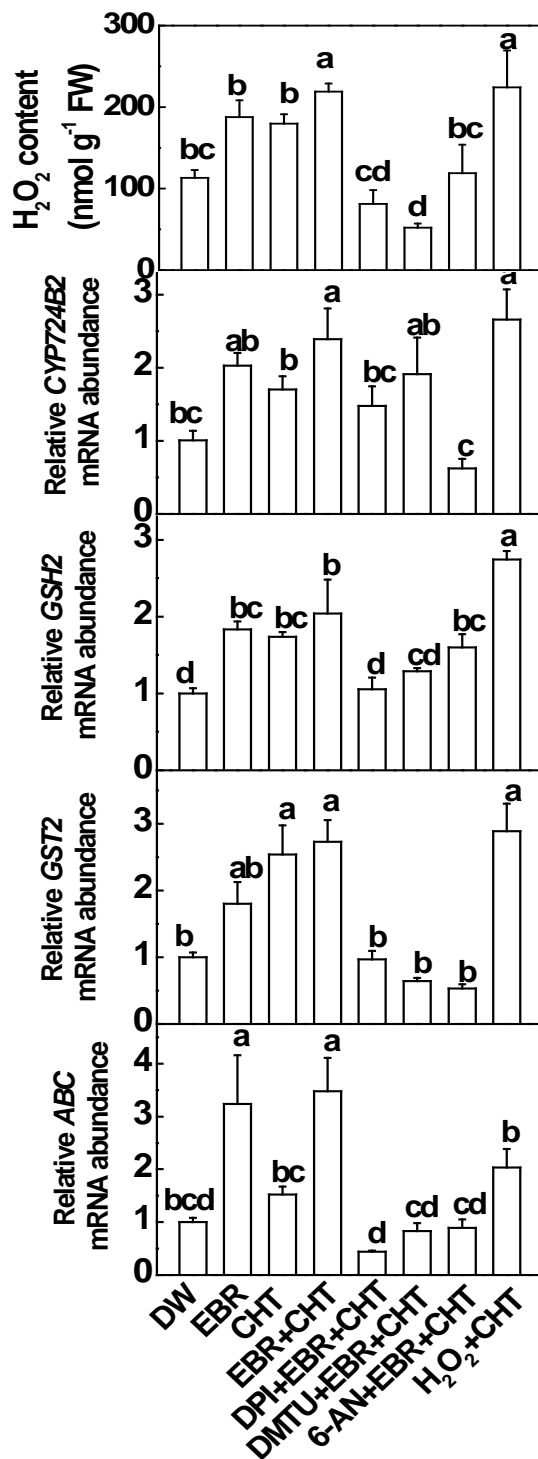

**Fig. S5.** Glutathione accumulation, GR and GST activity as influenced by H<sub>2</sub>O<sub>2</sub> and glutathione homeostasis in tomato leaves. Plant were treated with EBR or H<sub>2</sub>O<sub>2</sub> with or without pretreatment of inhibitor of NADPH oxidase (DPI), scavenger of H<sub>2</sub>O<sub>2</sub> (DMTU) or blocker of glutathione homeostasis (6-AN) and then applied with chlorothalonil (CHT). EBR at 0.1 μM was applied 6 h prior to pesticide application and leaves were taken at 5 d after application of CHT at 11.2 mM. Data are means of four biological replicates (±SD). Means denoted by the same letter did not significantly differ at *P* < 0.05 according to Tukey's test.

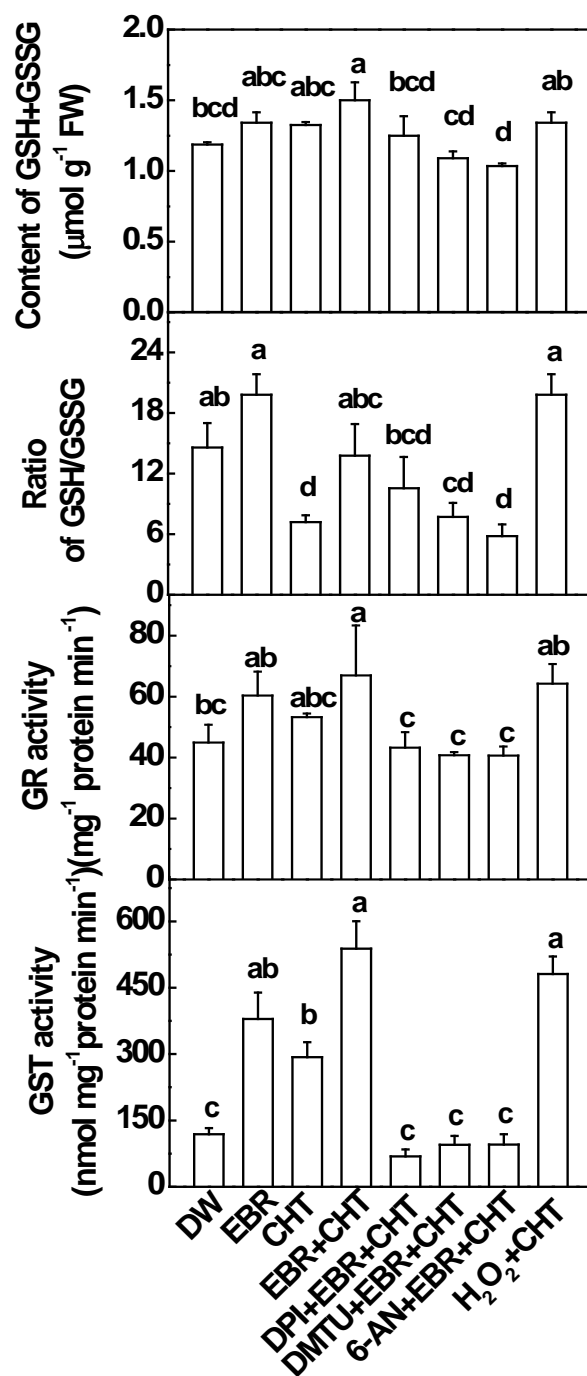

**Fig. S6.** Chlorothalonil (CHT) residues as influenced by H<sub>2</sub>O<sub>2</sub> and glutathione homeostasis in tomato leaves. Plant were treated with EBR or H<sub>2</sub>O<sub>2</sub> with or without pretreatment of inhibitor of NADPH oxidase (DPI), scavenger of H<sub>2</sub>O<sub>2</sub> (DMTU) or blocker of glutathione homeostasis (6-AN) and then applied with CHT. EBR at 0.1 μM was applied 6 h prior to pesticide application and leaves were taken at 5 d after application of CHT at 11.2 mM. Data are means of four biological replicates (±SD). Means denoted by the same letter did not significantly differ at *P* < 0.05 according to Tukey's test.

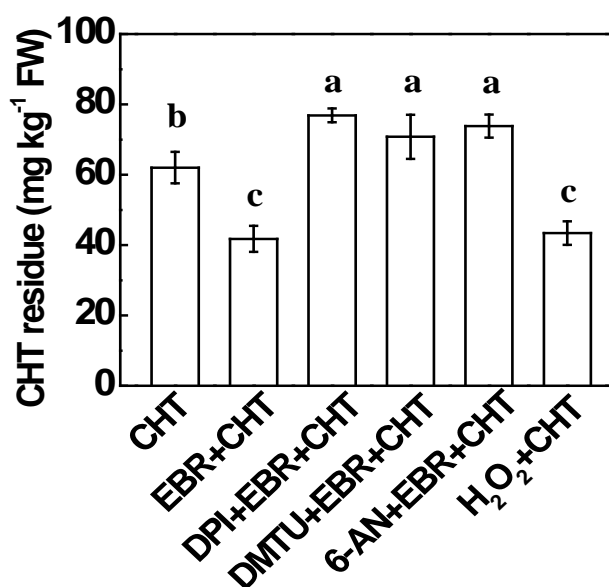

**Fig. S7.** GSH homeostasis and GST activity as influenced by the silencing of *GSH1*, *GSH2* and *GR* as well as the EBR treatment. EBR at 0.1  $\mu\text{M}$  was applied 6 h prior to pesticide application and leaves were taken at 5 d after application of CHT at 11.2 mM. Data are means of four biological replicates ( $\pm\text{SD}$ ). Means denoted by the same letter did not significantly differ at  $P < 0.05$  according to Tukey's test.

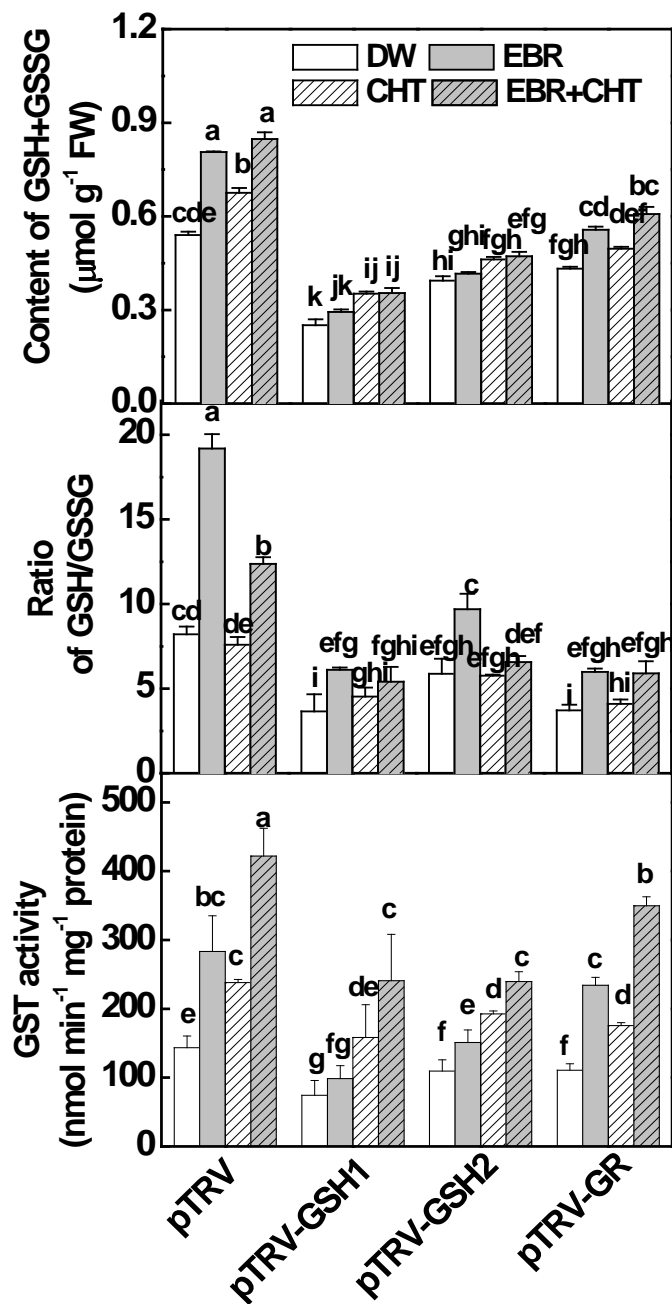

Supplement: srep09018-s1.pdf [file srep09018-s1.pdf]
